# Supplementary material for: High proton conductivity of H x WO 3 at intermediate temperatures: unlocking its application as a mixed ionic–electronic conductor
Source: Royal Society of Chemistry journal article supplement (doi:10.1039/d5ta05331e), 2025-01-01
Supplement: d5ta05331e1.pdf [file d5ta05331e1.pdf]

## Supplementary Information

### **High Proton Conductivity of $\text{H}_x\text{WO}_3$ at Intermediate Temperatures: Unlocking Its Application as a Mixed Ionic–Electronic Conductor**

Rantaro Matsuo<sup>1</sup>, Tomoyuki Yamasaki<sup>1,\*</sup>, and Takahisa Omata<sup>1,\*</sup>

<sup>1</sup> *Institute of Multidisciplinary Research for Advanced Materials (IMRAM),  
Tohoku University, 2-1-1 Katahira, Aoba-ku, Sendai 980-8577, Japan.*

### S1. Microstructure of sintered $H_xWO_3$

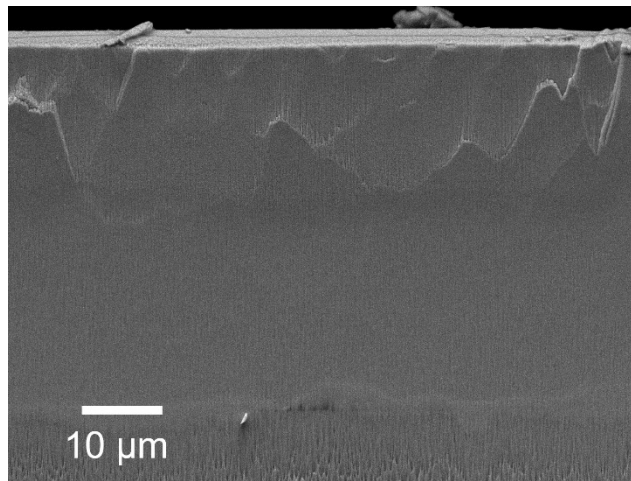

**Figure S1.** Cross-sectional SEM image of  $H_xWO_3$ . The cross-sectional surface was prepared using a cross-section polisher after cutting the hydrogenated  $WO_3$  pellet. Needle-like features were observed on the cross-sectional surface as a result of ion-beam polishing. Grain boundaries were too fine to be resolved, suggesting a compact and homogeneous microstructure composed of very fine crystallites.

## **S2. Hydrogen distribution in the sintered $H_xWO_3$ measured by TOF-SIMS**

### **S2.1. Background measurement of hydrogen in $WO_3$**

To evaluate the background hydrogen signal in the TOF-SIMS analysis and determine the necessary sputtering time required to eliminate surface contamination, depth profile measurements were conducted on a reference  $WO_3$  sintered pellet (annealed in flowing oxygen at 800 °C for 10 h) as well as on the  $H_xWO_3$  pellet. The TOF-SIMS depth profiles of the secondary ions were acquired in the negative polarity mode using a  $Bi^+$  primary ion beam (25 kV, 1.0 pA) and a  $Cs^+$  sputter ion beam (2 kV, 145 nA). [Figure S2\(a\)](#) shows the depth profiles of  $H^-$  and  $OH^-$  signals, normalized to the  $W^-$  signal for reference  $WO_3$  and  $H_xWO_3$  pellets. In the reference  $WO_3$  sample, the signals gradually decayed toward the interior of the pellet and became nearly constant after approximately 60 min of sputtering, indicating the elimination of the contribution from surface-adsorbed species. In contrast, for the  $H_xWO_3$  sample, the intensities of  $H^-$  and  $OH^-$  signals remained nearly constant throughout the sputtering process. Even after sputtering beyond the depth at which surface contributions were no longer observed in the reference  $WO_3$  sample, the signal intensities in  $H_xWO_3$  remained approximately an order of magnitude higher than those in the reference. These results clearly demonstrate that hydrogen in the  $H_xWO_3$  sample can be reliably detected above the background level observed in the reference  $WO_3$  sample.

### **S.2.2. SIMS area imaging of the cross-section of $H_xWO_3$**

To obtain SIMS imaging data free from surface contamination, a thin surface layer was sputtered prior to acquisition, and imaging was initiated from the depth at which the signal intensities of  $H^-$  and  $OH^-$  became stable. The imaging area was selected 300  $\mu m$  inward from the edge of the pellet. A  $500 \times 500 \mu m^2$  region was imaged to visualize the lateral distribution of hydrogen. [Figure S2\(b\)](#) displays lateral SIMS images of  $H^-$ ,  $OH^-$ , and  $W^-$ . In these images, the left edge corresponds to a depth of 300  $\mu m$  from the surface, and the right edge corresponds to approximately 800  $\mu m$ . To

convert the SIMS images into a concentration profile along the thickness direction of the sintered pellet (Figure 1 (b)), the signal intensities were integrated along the Y-direction.

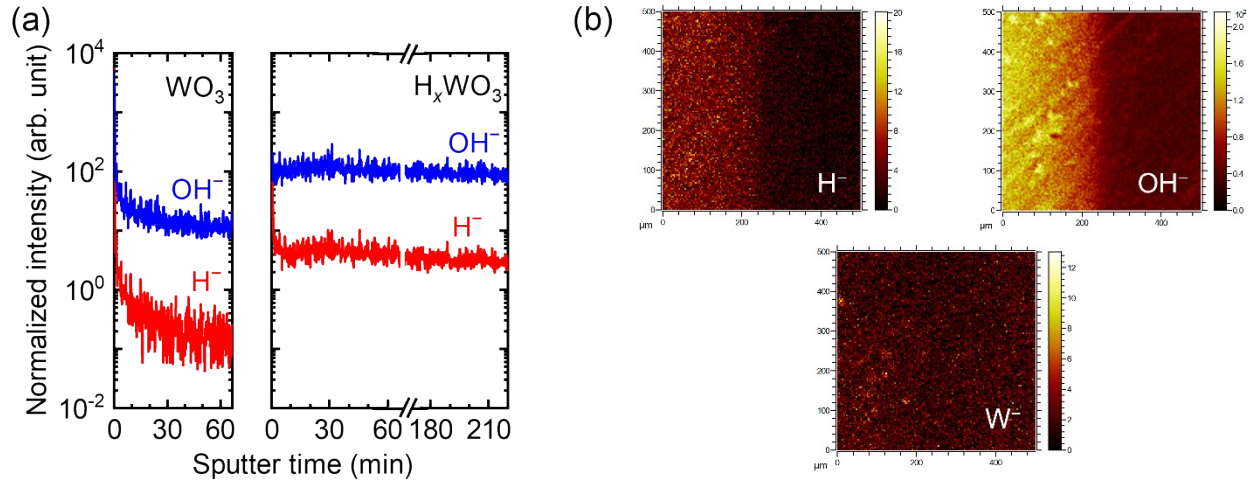

**Figure S2.** (a) Depth profiles of  $\text{H}^-$  and  $\text{OH}^-$  signals normalized to the  $\text{W}^-$  signal for reference  $\text{WO}_3$  and  $\text{H}_x\text{WO}_3$  pellets. (b) Lateral SIMS images of  $\text{H}^-$ ,  $\text{OH}^-$ , and  $\text{W}^-$  in the vicinity of the phase boundary in  $\text{H}_x\text{WO}_3$ .

### S3. Quantification of hydrogen in sintered $H_xWO_3$ by TDS

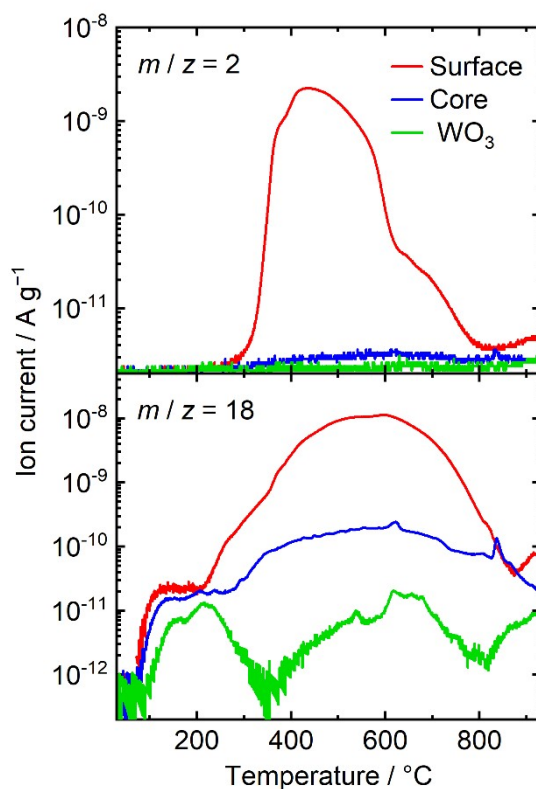

**Figure S3.** TDS curves of  $m/z = 2$  ( $H_2$ ) and 18 ( $H_2O$ ) for the hydrogen-rich surface (red) and hydrogen-poor core (blue) regions of  $H_xWO_3$  along with  $WO_3$  pellet annealed in oxygen at 800 °C as a reference (green). The release of hydrogen from  $H_xWO_3$  in the form of not only  $H_2$  but also  $H_2O$  is likely due to heating under vacuum conditions.

**Table S1. Summary of the quantification of hydrogen released as  $H_2$  and  $H_2O$ .**

|                                  | Surface              | Core                 |
|----------------------------------|----------------------|----------------------|
| H released as $H_2$ / $cm^{-3}$  | $1.3 \times 10^{21}$ | $3.2 \times 10^{17}$ |
| H released as $H_2O$ / $cm^{-3}$ | $3.2 \times 10^{21}$ | $8.9 \times 10^{19}$ |
| Total H / $cm^{-3}$              | $4.5 \times 10^{21}$ | $8.9 \times 10^{19}$ |
| $x$ in $H_xWO_3$                 | 0.24                 | 0.0048               |

#### S4. Growth behavior of the hydrogen-rich region by hydrogen annealing

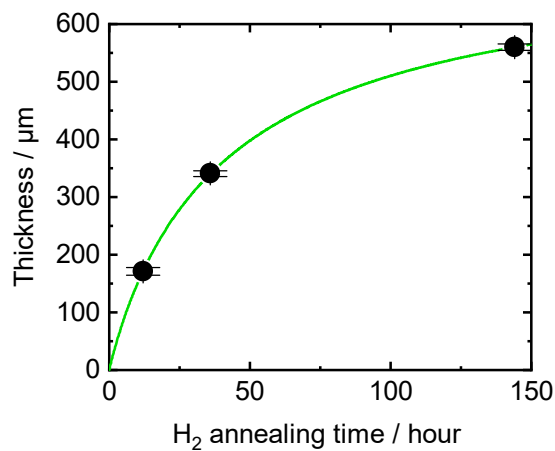

**Figure S4.** Thickness variation of the hydrogen-rich region as a function of annealing time. The green curve represents a fitting result. The sintered  $\text{WO}_3$  samples were annealed in a hydrogen atmosphere at 300 °C for varying durations. The thickness of the hydrogen-rich region, measured from the Pd-deposited surface, gradually increases with annealing time.

## S5. Supporting details of the electron-blocking measurement

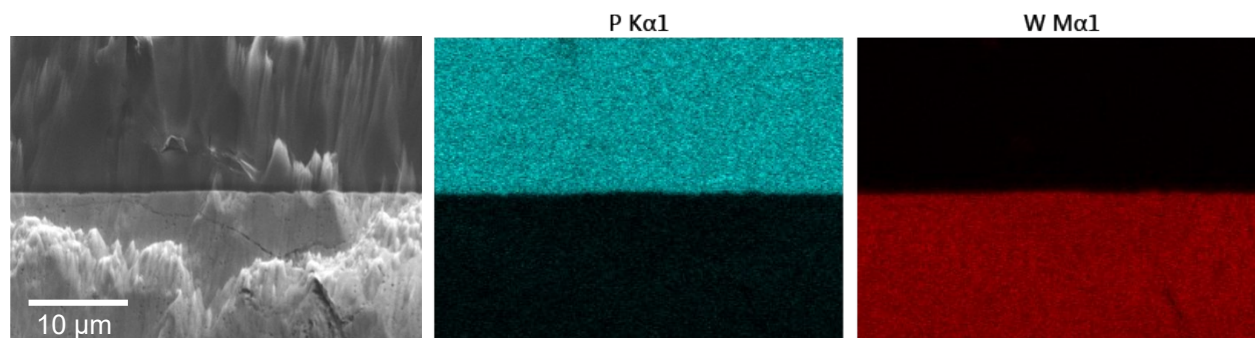

**Figure S5.** Cross-sectional SEM image of the electron-blocking cell and the corresponding elemental maps for P K $\alpha$  and W M $\alpha$  obtained by energy-dispersive X-ray spectroscopy (EDX). The elemental distributions confirm the presence of the phosphate glass electrolyte and the H<sub>x</sub>WO<sub>3</sub> layer. No delamination or gap is observed at the interface, indicating that the phosphate glass and H<sub>x</sub>WO<sub>3</sub> are well adhered.

### S5.1. Considerations of interfacial contributions in the electron-blocking cell

To clarify the possible effects of interfacial resistances in the electron-blocking measurements, we carefully examined the structure of the measurement cell and performed several control experiments. A schematic of the interfaces is shown in Figure S6(a). The interfaces can be summarized as follows:

- **Interface A:** Pd film / H<sub>2</sub> gas
- **Interface B:** Pd film / glass
- **Interface C:** Pd film / H<sub>x</sub>WO<sub>3</sub>
- **Interface D:** Glass / H<sub>x</sub>WO<sub>3</sub>
- **Interface E:** Triple-phase boundary of glass, H<sub>x</sub>WO<sub>3</sub>, and gas phase
- **Interface F:** Boundary between hydrogen-rich and hydrogen-poor regions within H<sub>x</sub>WO<sub>3</sub>

#### (i) Interfaces A and B

We prepared a Pd/glass/Pd cell and measured the current response under a DC bias (Figure S6(b)). This configuration includes only interfaces A and B. The cell exhibited a much larger steady-state

current than the electron-blocking cell, and no pronounced current decay was observed upon voltage application. These results indicate the absence of significant charge accumulation or interfacial polarization, consistent with efficient hydrogen dissociation/recombination at the Pd surface. We therefore conclude that the resistance contributions of interfaces A and B are negligible in the electron-blocking cell.

## **(ii) Interfaces C, D, and E**

We then compared electron-blocking cells with and without a Pd interlayer between the glass and  $\text{H}_x\text{WO}_3$  (Figure S6(c)). With the Pd interlayer (interface C), the current increased by a factor of  $\sim 3$  and reached steady state more rapidly, compared with the configuration without Pd (interface D only). This demonstrates that interface C provides an efficient pathway for proton injection from glass into  $\text{H}_x\text{WO}_3$ , whereas interface D alone introduces higher resistance and capacitance. Moreover, the pronounced current enhancement by introducing the Pd interlayer suggests that electronic current from hydrogen redox reactions at interface E contribute only a minor fraction of the total current. Since the Pd interlayer is not in direct contact with the gas phase, electrochemical reactions such as hydrogen evolution or uptake ( $2\text{H}^+ + 2\text{e}^- = \text{H}_2$ ) are unlikely to occur there under the modest overpotentials applied. Therefore, the predominant current observed with the Pd interlayer arises from proton transport through interface C into  $\text{H}_x\text{WO}_3$ .

## **(iii) Interface F**

Finally, interface F, located between hydrogen-rich and hydrogen-poor regions of  $\text{H}_x\text{WO}_3$ , is expected to play a key role in the impedance response. In particular, the markedly lower proton diffusivity in the hydrogen-poor region can account for the diffusion-limited behavior observed at low frequencies. A more detailed discussion of this assignment is provided in the main text.



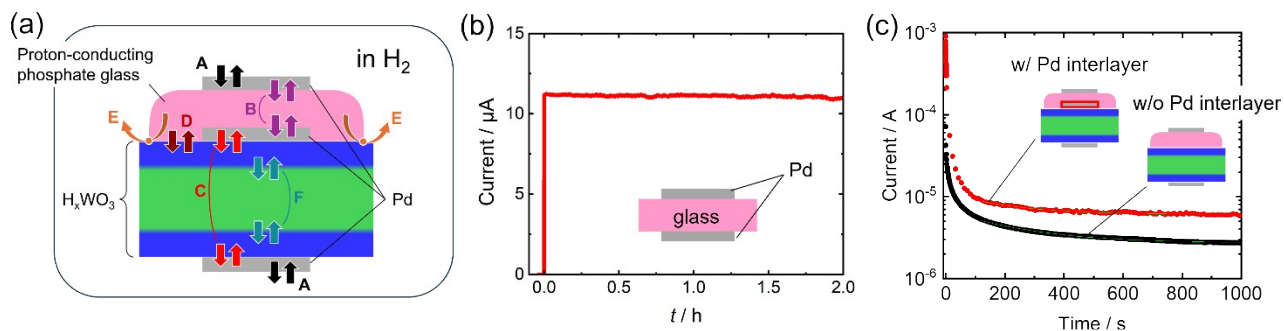

**Figure S6.** (a) Schematic illustration of the electron-blocking cell, showing the possible interfaces: (A) Pd/hydrogen gas, (B) Pd/glass, (C) Pd/ $H_xWO_3$ , (D) glass/ $H_xWO_3$ , (E) glass/ $H_xWO_3$ /hydrogen gas, and (F)  $H_{0.24}WO_3$ / $H_{0.0048}WO_3$ . (b) Time evolution of DC current under an applied voltage of 100 mV for a Pd/glass/Pd cell, which includes only interfaces A and B. (c) Comparison of the DC current response under an applied voltage of 100 mV in electron-blocking cells with and without a Pd interlayer at the glass/ $H_xWO_3$  interface.

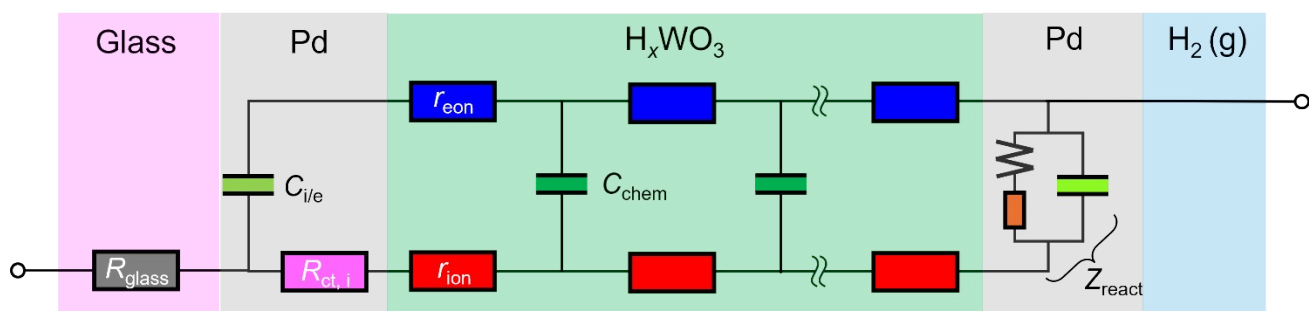

**Figure S7.** Illustration of the equivalent circuit for the asymmetric electron-blocking cell based on the transmission line model. The model includes ionic and electronic conduction pathways in the  $H_xWO_3$  pellet, as well as charge transfer processes at the glass blocking electrode interface and reactions at the gas–solid interface. The effects of hydrogen distribution inhomogeneity or the presence of multiple phases in  $H_xWO_3$  are not considered.

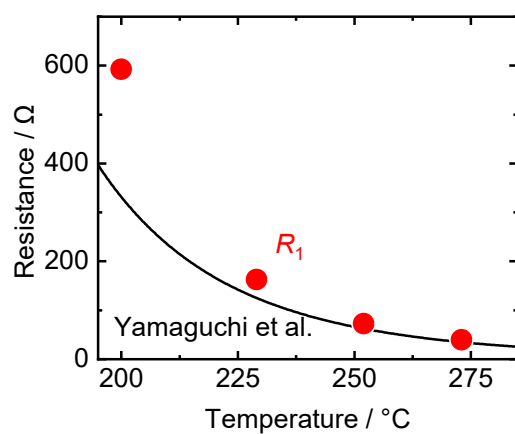

**Figure S8.** Temperature dependence of  $R_1$  compared with the resistance calculated for the glass with the same geometry using the reported conductivity data<sup>S1</sup>.

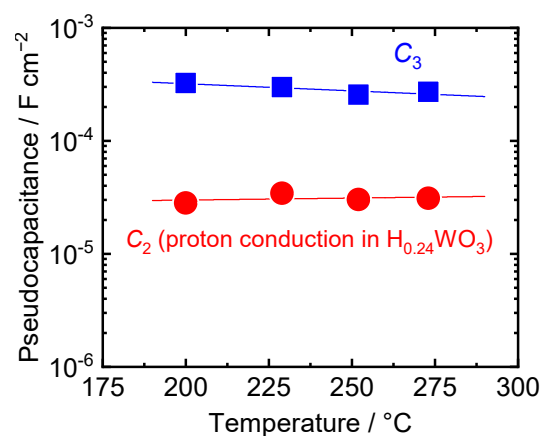

**Figure S9.** Temperature dependence of the pseudocapacitances corresponding to arc  $R_2$  and arc  $R_3$ , obtained from equivalent circuit fitting of the impedance spectra.

## S6. Electronic conductivity of $H_xWO_3$

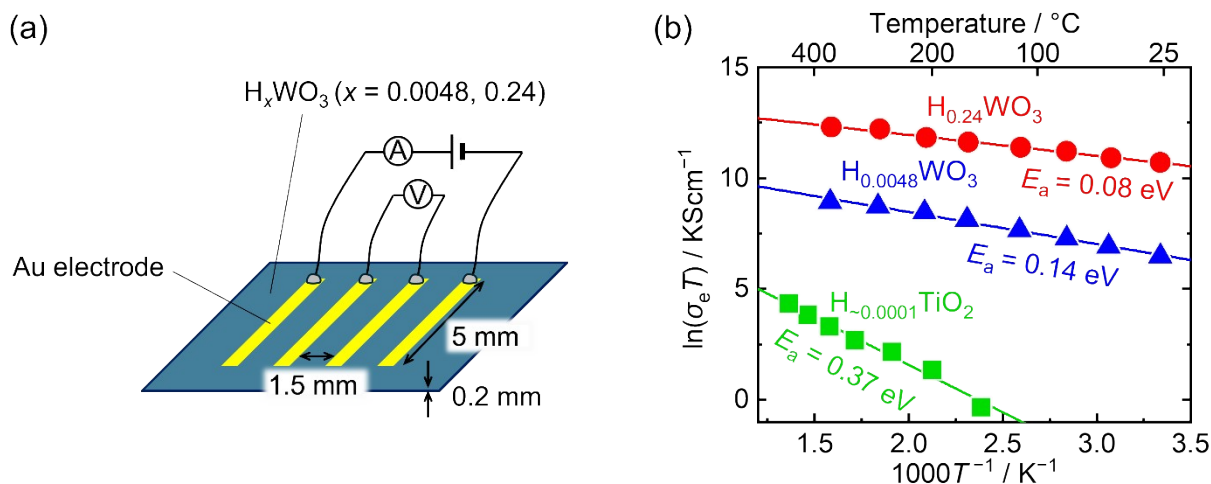

**Figure S10.** (a) Illustration of the planar sample for electronic conductivity measurements using the four-probe method. (b) Arrhenius plots of the electronic conductivity for  $H_{0.24}WO_3$  (red circle),  $H_{0.0048}WO_3$  (blue triangle), and  $H_{\sim 0.0001}TiO_2$  (green square) with the corresponding activation energies<sup>S2</sup>. The electronic conductivities of  $H_{0.24}WO_3$  and  $H_{0.0048}WO_3$  were measured under Ar to prevent changes in hydrogen content, while that of  $H_{\sim 0.0001}TiO_2$  was measured under  $H_2$  atmosphere.

## REFERENCES

- S1 T. Yamaguchi, S. Tsukuda, T. Ishiyama, J. Nishii, T. Yamashita, H. Kawazoe and T. Omata, *J. Mater. Chem. A*, 2018, **6**, 23628–23637.
- S2 T. Shiraiwa, T. Yamasaki, K. Kushimoto, J. Kano and T. Omata, *J. Am. Chem. Soc.*, 2025, **147**, 30757–30767.
